# Supplementary material
Source: publisher site journal article supplement (https://www.dovepress.com/article/351886)
Supplement: Supplementary file 1 [file get_supplementary_file.php]

**Figure S1.** Optical microscopy images of MHCC97H cells transfected with pLenti-cmv-EGFP or pLenti-cmv-RBM3 plasmids. Scale bar, 100 μm.

**Figure S2.** **Inhibition of RBM3 using shRNA suppresses EMT process and metastasis in MHCC97H cells.** (A) MHCC97H cells with stable down-regulation of RBM3 were constructed using RBM3-specific shRNA. (B) Expression of EMT-related factors and metastasis markers were detected by western blotting in MHCC97H-scrambled-shRNA cells and MHCC97H-RBM3-shRNA#2 cells. (C) Transwell assay of migration and invasion ability of MHCC97H-scrambled-shRNA cells and MHCC97H-RBM3-shRNA#2 cells. Relative levels of RBM3, N-cadherin, Vimentin, MMP9 and VEGF were quantitatively analyzed using Image J. Scale bar, 200 μm. Results are the mean ± SEM (error bar) from three independent experiments. *P < 0.05, **P < 0.01, ***P < 0.001.
